# Supplementary material for: The Development of Two High-Yield and High-Quality Functional Rice Cultivars Using Marker-Assisted Selection and Conventional Breeding Methods
Source: Int J Mol Sci. 2022 Apr 23;23(9):4678. doi: 10.3390/ijms23094678 (PMC9102896; doi:10.3390/ijms23094678)
Supplement: Supplementary file 1 [file ijms-23-04678-s001.zip › Table S1.xlsx]

## Sheet: Sheet1
Table S1. The health benefits of TNG 76 compared to TNG67
Name	Unit	TNG76	TNG67
Vitamin A	(1U/100g)	35.58	20.8
β- carotene	(1U/100g)	21.35	12.48
Vitamin E	(㎎/100 g)	14.03	9.59
α-Tocopherol	(㎎/100 g)	11.9	8.14
β-Tocopherol	(㎎/100 g)	0.89	0.54
γ-Tocopherol	(㎎/100 g)	1.18	0.84
δ-Tocopherol	(㎎/100 g)	0.06	0.07
DPPH scavenging activity	(ug/ml)	5937	5250
Total phenolic content	(㎎/100 g)	325.23	258.03
Folate	(ug/100g)	137.4	122
free amino acid	(㎎/100 g)	463.3	293.7
Ash	(g/100g)	7.82	6.3
Crude fat	(g/100g)	17.19	11.66
Crude fiber	(g/100g)	7.85	5.44
Vitamin K1	(ug/100g)	10.08	7.15
Vitamin B1	(㎎/100 g)	2.52	2.16
Vitamin B2	(㎎/100 g)	0.25	0.16
Pyridoxine	(㎎/100 g)	0.12	0.52
Vitamin B6	(㎎/100 g)	0.39	0.84
Crude protein	(g/100g)	11.92	12.02
Monounsaturated fatty acid (%)		49.71	47.72
Polyunsaturated fatty acid (%)		29.89	31.65
ω-3 fatty acid		1.29	1.26
Saturated fatty acid ) (%)		20.4	20.63
Data was provided from Food Industry Research and Development Institute in Taiwan
