# Supplementary material for: The Development of Two High-Yield and High-Quality Functional Rice Cultivars Using Marker-Assisted Selection and Conventional Breeding Methods
Source: Int J Mol Sci. 2022 Apr 23;23(9):4678. doi: 10.3390/ijms23094678 (PMC9102896; doi:10.3390/ijms23094678)
Supplement: Supplementary file 1 [file ijms-23-04678-s001.zip › Table S2.xlsx]

## Sheet: Table S1
Table S2. Primer sequences using for background sequencing on the purple functional rice population.
cM	Name	Forward primer sequence	Reverse primer sequence
chr.1
4.2	RM1282	AAGCATGACAGCTGCAAGAC	GGGGATGAAGGGTAATTTCG
20.2	CH0144	GCCCAGAGGGAGTAACTTAACA	TGATATGCTGGAAGCAAAACTG
30.5	RM1360	TTACCTCAGGCTCTTCAGGC	AGAAGTGAGCAATCATGGCC
50.8	RM580	GATGAACTCGAATTTGCATCC	CACTCCCATGTTTGGCTCC
62.5	RM3412	AAAGCAGGTTTTCCTCCTCC	CCCATGTGCAATGTGTCTTC
81.3	RI01068	GGATCAGAAGAGAAATGCAA	CCTCCAGCGATAATGAAGTA
100.4	RI01073	AATTGATCTCGAGAATTTGC	AGATCATCGTGGAGACCAT
117.7	RM11512	TGTGGCAGAAGAACCAATAGGG	CCAGCGAAGGCATTAGAGAGC
132	CH01104	CATGCATGCAAACCCTAGC	CTAGGCCCCCTACGGTTAAA
149.3	CH0109	GCGAACAGAACATGCTCAAA	GGCACGGAACAAGGAAATTA
168	RMM12204	AACAAACATTCTGGGAGTTG	ATGATTCGATACCACGACTT
181.8	RM6840	TACCAAGACTCCGCTATGGC	GAAGAAGGGATCATGGATCG
chr.2
9	RM211	CCGATCTCATCAACCAACTG	CTTCACGAGGATCTCAAAGG
13.4	CH0202	GTTGCTCTTCACACCACAGT	ACCAAAATTACCCCAAAAATA
33.6	CH0210	CCCAGTCTGCTGCCATCT	GAATGTATTTCAGTTCCAGTAAG
41	CH0206	GTTGGATTCCACTCCTTTCG	GGCATCACATGATTCTGCAA
57.6	CH0244	CACACATCCAGATGAAACAA	GGAAGGACCCACACCAAA
78	RM1379	TTGGAGCCGAGGACCAAG	ATGTGCTACTGCTAGTGCTAGC
93.2	RM5651	AAGAGAACATTTGGAATCCT	TAACCTGTGCCTTGTTTG
110.9	RM1367	GTGTGTACGTAGGATCGGAG	TGCTACTCCTAGCTGCTACC
118.1	RM525	GGCCCGTCCAAGAAATATTG	CGGTGAGACAGAATCCTTACG
135.5	RM240	CCTTAATGGGTAGTGTGCAC	TGTAACCATTCCTTCCATCC
146.9	RM5916	GCTATAAGAATCGTATTAAG	TACTGCTATTAAAGTCAGAA
chr.3
7.9	RM6297	TTCTTCTCTCCTCTCGCTCG	CCAAAGCAACCCATCTCAAC
11.5	RM231	CCAGATTATTTCCTGAGGTC	CACTTGCATAGTTCTGCATTG
25.9	RM5480	AAGAAGAGGATTTCCTCGCC	GTCCAAGATTTCGCAACGG
40.3	RM218	TGGTCAAACCAAGGTCCTTC	GACATACATTCTACCCCCGG
59.5	RM6929	GTTGAACATATTGTGGGGGC	GGTTCTGGACTACATCGAACG
78	RI03004	ACTCAATGTTAGCATTTCGTCT	TTTGGCAACCACCGTCT
91.1	STS330	TGACAACTCATCTACCTGCTT	AGTATTACGAATCTTCCGGTC
120.4	RI03006	TCTTTAGCGTGGGTTGGG	CGTATTCTCCTCCTGTGATGC
140.1	RM8267	TGAGGCTGAATAAGATCGAC	TACTCCACTCTCCCGATTTG
160.1	RI03008	ACAGTTAGGGAAGAAATAGCG	TCGTCTGGAAACCGTGAG
chr.4
7.9	RM518	CTCTTCACTCACTCACCATGG	ATCCATCTGGAGCAAGCAAC
12.2	RM6487	AGAAGCTGTAGACGATGGCC	CTAGACCTCATCCCCTTCCC
28.6	SLS189	ATCAGAATATTCGGGAAAAG	TTGTATACTCATTATGTAAATGGA
36.2	CH0410	GCTTCTCCTGGTTGTATGC	AAAATAGGGAGGCAGATAGAC
51	STS381	TTCTTGTGAGAAATAACGCAT	TCAAATTCCAGAGTATTGCAT
58.9	RM1155	AGGGAGTGTGGCAACTATGC	GGGAGGAGTGAGAAGGGATC
78.2	CH0490	CTGTCTACATTCTTTTTACTACTCG	GACTGATGTCTCGAGTTTTGTA
96	CH0453	ATGAGTCAGCTAAGTACGTGTG	GAGCCACTGTTCAGTTACCA
113.2	RM1153	ACCAACGCCAAAAGCTACTG	TACTCGCCCTGCATGAGC
chr.5
12	RM1024	GCATATACCATGGGGATTGG	GGGATTGGGATAATGGTGTG
24.7	RM267	TGCAGACATAGAGAAGGAAGTG	AGCAACAGCACAACTTGATG
41.4	CH0506	GAGAAAGAGTGGAAGGAG	AGTATCGTCAGGAGGGTC
59	RM18419	TCACGAATCAGCTTCTTTCTCC	ATATTGGTGCTGCAGGTAGTGG
74.2	RM8211	GTTTGGGAAGGAGGAATG	AAGTAGAAACGGCCAACAC
91.2	RM5642	AAAAACCGGCTAATCCCTCC	TTCGATGGGATTGATCGC
104.4	RM3620	TCCTCTCCACCTTCAAATCC	ACCATCCTCTGCTGCTGC
chr.6
0.9	RI06012	TCTTGCATACGTAGCTTTCA	GTCCAAGAGAACAGAAATCG
19.1	RM253	TCCTTCAAGAGTGCAAAACC	GCATTGTCATGTCGAAGCC
34.3	RM50	ACTGTACCGGTCGAAGACG	AAATTCCACGTCAGCCTCC
51	SLS163	TGATGTGATAAAGAAGCAGA	TTTATACTCTTGGTGACGTG
72.6	RM20207	GTTGCATATATCCGGTTTGG	TAGTACAGAGTCGTCACGTTTGC
88	RM20372	GGCTTGTTAGCTAGGGTTATTGG	GAACATTTGCTGATGTCTCACC
107.6	CH0626	GTGTGGCAATTTAACATCCT	TTTCATCAAATATCCCCATC
124.4	RM20767	TCGATCGATCCTAGACTCCTTCC	GACTCCACGAACAGCAGGTTAGC
chr.7
0	RI07001	AAACTTGGCACCTAACGC	GCTGATACTGGGAATACCCTA
17	RM20974	CCATCCATGGCTCGGACTGC	AGGCGTCTGGAGAATCGGTATCC
35.7	RM8263	TTTGCTGTCCCTTTGTTC	TGCAATTCAAAGTCTTAGGG
41.7	SLS164	CTGCATATTTTCCCCTATTA	GGACAAGGCACTAATACAGT
50	CH0725	ATCAACCACCTTACCGTGACTT	CTGTAAGATGGATCTTGCCAAT
67	RM11	TCTCCTCTTCCCCCGATC	ATAGCGGGCGAGGCTTAG
81.9	RM1365	CAGGCGGTGATTTTCTTCTC	GACAACTCAGTTCCAATCCC
93.9	RM234	ACAGTATCCAAGGCCCTGG	CACGTGAGACAAAGACGGAG
105.7	CH0707	CAAGACAGCAATGAAGATCA	GAGGATCATGGTTCAGACAT
116	RM1362	TGATCTAAACAGGCCCTTAG	CATCATCAAGACCACACATC
chr.8
13.4	RMM22315	ACAATTCACACGAATTTTCC	CAAGTACTAACCGCCATATCA
29.4	RM22444	ATCTGCCAGGTTGCAAGATATGG	TGGGTTTGCTAGCTAGTGTTGACG
45.4	RM72	CCGGCGATAAAACAATGAG	GCATCGGTCCTAACTAAGGG
50.8	CH0892	GACCTGCTCATATTCATACCTT	CGAGGATTCATTGTCCTAATAA
66.5	RMM23055	AACAGGTGGGTACAGACTCA	AAATGGAAAGTGAATAGCTG
86.7	CH08100	AGTACAGCTGGGAGTACAGAAG	AGTGGCAATCAGTAACACATTA
103.1	RMM23460	AGCTGATTCAGGAGAGAGC	TAGTTAGGCAGCAACAGCA
120.4	RM4154	AGAAGATCGATCGAAGAAAC	ATCATGAAACACAATAAGGC
chr.9
19	CH0909	GTGTTCGATAAACTGTTGGAG	AATGTGAAGGCATGGATAATA
26.7	RM1328	GAATGGGATTAGACGATTTG	CCATGAGTGACATCAAAAGG
47	SLS506	ATCTCTCTAATCTTGCTGGCT	TCCGTAACCCAAATAAACATA
59	SLS510	TCAATTTGTGGGTTAGGTTTA	AACTGTGATTATCAACACGC
64	SLS513	GGAATTAACTTTCCACTCGTT	TTGTTCCAATGAGCAATTAGT
72.1	RM242	GGCCAACGTGTGTATGTCTC	TATATGCCAAGACGGATGGG
90.7	RM6971	TTTGCGAACTAGACAAGGCC	GCGTCATTCTCGACGAGC
93.5	RM3744	CAGGTAAGTTTTCATTTTCA	GAGCAGGAGTAACAGTTGTA
chr.10
5.5	RM222	CTTAAATGGGCCACATGCG	CAAAGCTTCCGGCCAAAAG
23.1	RMM25301	GGACCATTTTTGTTAGCGTA	TTTCAGTATATTTTCTGCGTACA
35.9	RM6144	TGGAACTCAACGGGAGTCTC	GAAGTAGTGGAATCGGCGAG
56	CH1016	AAGCGACAGCGCACGAAAC	GTTATTGGCACGTGGTGTG
73.7	RM6673	CATCGCATCGTATCGTATCG	GCTTCAAACACGCCTTCTTC
chr.11
20.3	RI11002	AGAGCGGACGAGGATG	GGAGTTAGAAGGCTATACAAAA
40	CH1103	AATAGCTTATCAAGCTGTGT	TACGTTTACCTCGAGACCAT
66	RM1355	CCTCCACATAAGCGAAGAGC	TGACGCCCAGAAGAGGTATC
79.1	RM21	ACAGTATTCCGTAGGCACGG	GCTCCATGAGGGTGGTAGAG
80.2	RM1341	AACCTGGAGGTGCTGGTCTC	TTTCTCCCCCCCAACCAC
100	CH1109	AAGAAAAATATCTATTGAGGAGTG	GGAGGACCATAAATGACGG
115.1	RM224	ATCGATCGATCTTCACGAGG	TGCTATAAAAGGCATTCGGG
chr.12
2.5	RM27404	GTTGCATGGCAACGAGGAGAGG	GTTACGACCGTGCCATCTTGTCC
5.5	RM27413	TCATGATCACTAGACGGTGAGACG	GTGTTGCCCAAGGAATTGAGG
19	RM5927	TGTATAGCCCGGAAGTATGATCC	TCTGGTCTCGTCTCTCATGTGC
38.1	RM27696	CTTGTCGTCATCTCAATCACAAGG	AAGTGACACATGAGAAGCCAACG
55.9	RM28083	GTAGGATTGGAACCAGAGAAGG	CTAGTGTGGGTTTCTCCAGTGC
75.8	RM6732	AATTTTGAACACCTCAAAGG	TTTTCAGTGCATGTCTTCG
