# Supplementary material for: The Development of Two High-Yield and High-Quality Functional Rice Cultivars Using Marker-Assisted Selection and Conventional Breeding Methods
Source: Int J Mol Sci. 2022 Apr 23;23(9):4678. doi: 10.3390/ijms23094678 (PMC9102896; doi:10.3390/ijms23094678)
Supplement: Supplementary file 1 [file ijms-23-04678-s001.zip › Table S3.xlsx]

## Sheet: Table S2
Table S3. Primer sequences using for background selection on the red functional rice population.
cM	Name	Forward primer sequence	Reverse primer sequence
chr.1
2.3	RMM4959	AGCACAGAGCTAGGGTACAA	AGCTCCAACCAGCTTAACTA
16.1	CH0102	TTCACGAAGCCTCGTTATCTC	GGGTTTCGACTTTCGAACAA
24.7	RM1	GCGAAAACACAATGCAAAAA	GCGTTGGTTGGACCTGAC
52.1	RMM10617	GAAAACATGGATTGATCTGC	CCAACATCATCTTCACTTCA
59.4	RM10695	ACTCCATGAAACAAACGAAC	TTGAATTCTACTAGTTTGGAAGG
102.3	RM488	CAGCTAGGGTTTTGAGGCTG	TAGCAACAACCAGCGTATGC
132	E864	CTACTGCAAAATGCGTGGTC	CACGAGTTGGTGCTTGGTAG
166.9	RM12182	GTTACGCCGAATCATGTCATTCATCC	CGGAGAGCATATTCTTGCTTGCTACC
chr.2
10	CH0203	TCCACTACGGCAGAAGTTAC	CAGGTTTCAAGGACAGTTATG
23.3	RM12601	GCGAACTCGACGACTACTCAACC	CACAACGTCGTCTCCAAGTGC
36.3	RM5459	GTGGTCTGGGAGTTGTTGTCACC	CCATTGCCATTGCAGTTGTATCC
45.6	RM6375	AACGACAAGAGATGCACGTG	TTCGGGGATAGATCGACAAC
57.9	E437	AGCTGAGCATGGAGGAGAAG	CGTTTATCATCTGCGTGTAG
74.5	RM13353	CATCTACAGCTGCCACCAAGAGG	GGTGAGCCCACATGTAAGTTGC
82.7	RM13435	GCTCATCGTGAGCACAATTTCG	TAGTAGTGCGATAGCCGGAGAGG
101.5	RM13630	GCCGCTGATCTCTTACCTGTTACGG	GTGCTTCGGCACAGGTCAATGC
108.3	RMM5706	TTTTTACTTGTGTGGCTTGA	CAGCTGGTACCTACCAAGATTCATTTCG
123.9	RM6933	TAGCAGAAACCAATGCTCGC	AGAGGTGGAAGGTAGTCACTCC
149	RMM14140	TGCAATGTGCGATCTATCTA	CCATTTGATCAGGATTGTGT
chr.3
2.2	RM3203	AGAGCATCATGCAGGTCCTC	ATACGAATGGAGTGCAAGGG
15.2	RM6849	GGGAGATAATGGCGGTTGACTTGC	CGCCGGCTTTCGCTTTATTCC
65.4	RM6959	GATTCCTATGGAGGATTGTTGC	AACTCCACCGGTGTTAAGAAGG
75.1	C53358	GGAGGAATGAATGAATGAAG	GCAGTATTCATACATAGGAG
80.3	RM15187	AGCCTCCTAGAACGGCAAAGG	CTATGTTTCGTGCAACCAAGTCC
91.1	RM16	CGCTAGGGCAGCATCTAAA	AACACAGCAGGTACGCGC
94.9	RM15490	GTGGGAGAGGCGAGGGTTTAAGG	CAGGGCCCATATGTGAGTTGAGG
101.6	RI03005	AGACTGGAACGGGATCATTG	ACGTGTTGCGGGCTCA
157.5	RM6135	AGGAGGCAGTAAGGCTCAATCG	CCACAAACTCGCAAACCAAACC
chr.4
6.5	E2762	GCTCTTCCCTGATTGATTAC	TCCAAAACTAAGCCATAGTC
25.4	RM5687	GATCGCTGGCGATTGATC	GACTTGTGGGGTGGTTTTTG
49.7	RMM16867	CCCAAAGACTCTGTTTCTTG	AATCTTGCCTTGTGATGAAT
56.1	RM1359	AACGAATTCTATTTTGCGTC	TTCTTCTCATTTCAATTCGC
68	RM3524	CTGTCTCCGTCTTCCTCACTCG	TGGAGAAATCTCCCTTCCTGAGC
85	RM3288	CTCGTACCGTCAAAAGACC	AATCTGGAGGCACTGTCAC
90.7	RM470	TCCTCATCGGCTTCTTCTTC	AGAACCCGTTCTACGTCACG
96	CH0453	ATGAGTCAGCTAAGTACGTGTG	GAGCCACTGTTCAGTTACCA
108	STS344	GTCGAGAGCAACACAATACA	TTAGATCATGATTCGGAAATG
117.3	C53391	GAATTCCTTCATTAGTTAGC	AGAAGGCAACTCATAATTAC
chr.5
24.7	RM267	TGCAGACATAGAGAAGGAAGTG	AGCAACAGCACAACTTGATG
31.5	RM3777	GCTCCCAAATCTTGGTCTTG	TCTCACCTCTTCCCTACAAGC
43.3	RM18084	TCTATCGTACGTATTGACCAGTCC	TACCCTGCACAACACTATCTAGC
59.8	RM18419	TCACGAATCAGCTTCTTTCTCC	ATATTGGTGCTGCAGGTAGTGG
76.2	RM1386	TCAAGCTGCATTAGGAAGACACC	AACTTAGCTGAAACGCAACACG
95.8	RM3870	TACATCTCCGGCGTTTACAC	CCAAGGTTGAAACAGGAAGC
100	RM6972	GCTCTCCTGTGGGTTTTCAG	CATGGTGCTCCTACTGGTTG
117.2	RM334	GTTCAGTGTTCAGTGCCACC	GACTTTGATCTTTGGTGGACG
122.3	RM19199	GCTCTACCAGGTATTATAGCCGATCC	AACTCCTCCAAGGTTCCATAGCC
chr.6
8.2	RM190	CTTTGTCTATCTCAAGACAC	TTGCAGATGTTCTTCCTGATG
54	RM136	GAGAGCTCAGCTGCTGCCTCTAGC	GAGGAGCGCCACGGTGTACGCC
89	RM20377	GTGTGTGATGTGCATGTTTCTGC	CATGTGATGCCCTGTAGGAACC
95.4	RMM7329	TAGCACATGATTATCGGATG	GTGTGCATAGGATATGTTGC
110.6	RM400	ACACCAGGCTACCCAAACTC	CGGAGAGATCTGACATGTGG
chr.7
17.6	RMM20991	GATAGCGGAAGAAAATGAGA	ACCATTGAATCGCTTTAAGA
25.4	RM1134	ACACCCAACTTTTCTCACGC	AGCTAGGGTTTCGATCTCCC
41.7	RMM21160	GAACACCACAATGTGAAGC	CCAACTCTTTCCAATAATCC
61.9	RM418	GATCGAGCATCAACACAACG	TTAAGTCTGAAGCCCCTGCT
71.6	CH0712	CGTGGAGCTTTGAAATTATAG	AGTAAAGGGCAGTATCCATC
81.9	RM1365	CAGGCGGTGATTTTCTTCTC	GACAACTCAGTTCCAATCCC
93.9	RI07050	TGATCGATGGAATTATCTGG	ACACCGTTGAACAACAACA
105.7	CH0707	CAAGACAGCAATGAAGATCA	GAGGATCATGGTTCAGACAT
chr.8
3.3	RM152	GAAACCACCACACCTCACCG	CCGTAGACCTTCTTGAAGTAG
13.4	RMM22315	ACAATTCACACGAATTTTCC	CAAGTACTAACCGCCATATCA
26.3	RM1376	ATGCATGTGTGATGACTGACAGG	TCTTTCTAATCCGGGTACTCTTGC
38.8	E60275	AGGAAAGGCAAAACCATAGC	TTGTGCACAAGTCTAAAACG
60.8	RM339	GTAATCGATGCTGTGGGAAG	GAGTCATGTGATAGCCGATATG
109.3	RM447	CCCTTGTGCTGTCTCCTCTC	ACGGGCTTCTTCTCCTTCTC
chr.9
19	CH0909	GTGTTCGATAAACTGTTGGAG	AATGTGAAGGCATGGATAATA
23.5	CH0903	AATCTGGGTACCAAATGATG	TGCAAATTGCTTAAATAGGA
35.6	RMM24119	TTCCCGTATAGCTTACAAAAG	GGGCCACAATATATTCAGAT
47.2	SLS506	ATCTCTCTAATCTTGCTGGCT	TCCGTAACCCAAATAAACATA
59.6	SLS510	TCAATTTGTGGGTTAGGTTTA	AACTGTGATTATCAACACGC
72.1	RM242	GGCCAACGTGTGTATGTCTC	TATATGCCAAGACGGATGGG
chr.10
0.8	CH1011	GAAAAGCTTCTTCGTGAATG	CAAAAGCCAAAGAAAGCTAC
7.2	CH1004	ATAATGTGCTGGGTCTGGAG	TGTGCACAGGCTACCTTTCT
24.2	RMM25327	CATCGCCCTATCTCACTCT	GCTTGATCTAGAGGAGGAGAA
42.7	RM1375	CTACACGCGCAAACTCTGTC	ATGAAGGTCTAGGCTGCACC
56	CH1016	AAGCGACAGCGCACGAAAC	GTTATTGGCACGTGGTGTG
73.7	RM6673	CATCGCATCGTATCGTATCG	GCTTCAAACACGCCTTCTTC
chr.11
17.3	RMM5918	AGGAAAGCCACAGAAGTGTA	CCAGGTTGGTAAGAACATCT
31.6	RMM26255	CCAAAGATCCCTATTCACAA	AAAGACAAATTGGATACTGAGA
49.1	RM202	CAGATTGGAGATGAAGTCCTCC	CCAGCAAGCATGTCAATGTA
55	RM26459	TAACCTATATCCCGCAGCAAAGC	TATGGGATCTGTACCCGTCATGC
66.6	RM1355	CCTCCACATAAGCGAAGAGC	TGACGCCCAGAAGAGGTATC
89.6	RM4601	CATACATGTGAACCTGACTG	CTAGCTTAGCATCTCCTCAA
chr.12
19.1	RM5927	TGTATAGCCCGGAAGTATGATCC	TCTGGTCTCGTCTCTCATGTGC
29.6	RM27618	TGCATGGTCAACCATATGAAGC	TTTCACATCCCAGACGAGAGG
41.8	RM7003	GGCAGACATACAGCTTATAGGC	TGCAAATGAACCCCTCTAGC
55.9	RM28083	GTAGGATTGGAACCAGAGAAGG	CTAGTGTGGGTTTCTCCAGTGC
64.4	G2140	GATCGGAGACGCAGAGAAAC	CAAGTAAAAAACAAGGGAGG
78.9	RM28438	GTTCGTGAGCCACAACAAATCC	GTTAAATGCTCCACCAAACACACC
93.2	RM28534	GAGAGAGAAACGAAACCAATCCAAGC	CGACTCCGTCCTTCCATCTCG
